# Supplementary material for: Burden of illness of hip fractures in elderly Dutch patients
Source: PubMed Central journal article supplement (PMC6940317; doi:10.1007/s11657-019-0678-y), 2020-01-03
Supplement: 11657_2019_678_MOESM1_ESM.pdf [file 11657_2019_678_MOESM1_ESM.pdf]

## Missing data

### Health-related quality of life

To ensure the optimal use of available data, missing data were imputed in a multi-step process.

Firstly, individual missing dimensions of the EQ-5D were imputed using multiple imputation, using chained equations to enable imputation of missing values in multiple variables [1]. The non-missing dimensions of the EQ-5D and VAS at the same time point, plus gender and age at injury were used as independent variables. Secondly, if T2 EQ-5D questionnaires were missing in its entirety, the EQ-5D dimensions at T2 were imputed using multiple imputation, using all five EQ-5D dimensions at T1, the same EQ-5D dimension at later time points, gender and age at injury as independent variables.

Thirdly, when EQ-5D data were missing in its entirety at a particular measurement other than T2, linear interpolation between time points of utility values was applied. Linear interpolation was only applied for time points after surgery. When utility scores at T5 were missing, these were assumed equal to utility scores at T4. Finally, EQ-5D utilities were imputed using multiple imputation, using all available EQ-5D utilities at other time points as independent variables. Table A1 shows the percentages of missing items that were imputed at each step of the imputation procedures.

Imputation of EQ-5D dimensions (step 1 and 2) were performed using ordered logit regression models, because EQ-5D dimensions are categorical variables. For imputations of utility values (step 4) predictive mean matching was used [2]. Predictive mean matching provides a linear prediction and imputes missing values by nearest-neighbour donor, with the distance based on the predicted value of the missing variable from the linear regression. Using predictive mean matching ensures that the distributions of utility values (bound between -0.329 and 1.000 in the Dutch value set) are preserved.

*Table A1 Details imputation procedure EQ-5D dimensions and utilities*

| Imputed variable                                                   | Complete items | Missing items | Total items | % missing |
|--------------------------------------------------------------------|----------------|---------------|-------------|-----------|
| Step 1. Imputing single EQ-5D Dimensions using multiple imputation |                |               |             |           |
| T0 EQ-5D Mobility                                                  | 651            | 5             | 656         | 0.8%      |

|                                                                       |       |      |        |       |
|-----------------------------------------------------------------------|-------|------|--------|-------|
| T0 EQ-5D Self care                                                    | 652   | 4    | 656    | 0.6%  |
| T0 EQ-5D Usual activities                                             | 650   | 6    | 656    | 0.9%  |
| T0 EQ-5D Pain / Discomfort                                            | 644   | 12   | 656    | 1.8%  |
| T0 EQ-5D Anxiety / Depression                                         | 652   | 4    | 656    | 0.6%  |
| T1 EQ-5D Mobility                                                     | 232   | 7    | 239    | 2.9%  |
| T1 EQ-5D Self care                                                    | 239   | 0    | 239    | 0.0%  |
| T1 EQ-5D Usual activities                                             | 238   | 1    | 239    | 0.4%  |
| T1 EQ-5D Pain / Discomfort                                            | 239   | 0    | 239    | 0.0%  |
| T1 EQ-5D Anxiety / Depression                                         | 238   | 1    | 239    | 0.4%  |
| T2 EQ-5D Mobility                                                     | 591   | 10   | 601    | 1.7%  |
| T2 EQ-5D Self care                                                    | 597   | 4    | 601    | 0.7%  |
| T2 EQ-5D Usual activities                                             | 595   | 6    | 601    | 1.0%  |
| T2 EQ-5D Pain / Discomfort                                            | 595   | 6    | 601    | 1.0%  |
| T2 EQ-5D Anxiety / Depression                                         | 597   | 4    | 601    | 0.7%  |
| T3 EQ-5D Mobility                                                     | 618   | 4    | 622    | 0.6%  |
| T3 EQ-5D Self care                                                    | 620   | 2    | 622    | 0.3%  |
| T3 EQ-5D Usual activities                                             | 616   | 6    | 622    | 1.0%  |
| T3 EQ-5D Pain / Discomfort                                            | 617   | 5    | 622    | 0.8%  |
| T3 EQ-5D Anxiety / Depression                                         | 618   | 4    | 622    | 0.6%  |
| T4 EQ-5D Mobility                                                     | 551   | 7    | 558    | 1.3%  |
| T4 EQ-5D Self care                                                    | 558   | 0    | 558    | 0.0%  |
| T4 EQ-5D Usual activities                                             | 557   | 1    | 558    | 0.2%  |
| T4 EQ-5D Pain / Discomfort                                            | 550   | 8    | 558    | 1.4%  |
| T4 EQ-5D Anxiety / Depression                                         | 557   | 1    | 558    | 0.2%  |
| T5 EQ-5D Mobility                                                     | 540   | 4    | 544    | 0.7%  |
| T5 EQ-5D Self care                                                    | 544   | 0    | 544    | 0.0%  |
| T5 EQ-5D Usual activities                                             | 542   | 2    | 544    | 0.4%  |
| T5 EQ-5D Pain / Discomfort                                            | 537   | 7    | 544    | 1.3%  |
| T5 EQ-5D Anxiety / Depression                                         | 540   | 4    | 544    | 0.7%  |
| Step 2. Imputing single T2 EQ-5D dimensions using multiple imputation |       |      |        |       |
| T2 EQ-5D Mobility                                                     | 591   | 17   | 608    | 2.8%  |
| T2 EQ-5D Self care                                                    | 597   | 16   | 613    | 2.6%  |
| T2 EQ-5D Usual activities                                             | 595   | 17   | 612    | 2.8%  |
| T2 EQ-5D Pain / Discomfort                                            | 595   | 16   | 611    | 2.6%  |
| T2 EQ-5D Anxiety / Depression                                         | 597   | 16   | 613    | 2.6%  |
| Step 3. Imputing utility values using linear interpolation            |       |      |        |       |
| T2 Utility value                                                      | 9,170 | 416  | 9,586* | 4.3%  |
| T3 Utility value                                                      | 8,783 | 1148 | 9,931* | 11.6% |
| T4 Utility value                                                      | 7,761 | 1150 | 8,911* | 12.9% |
| T5 Utility value                                                      | 8,423 | 264  | 8,687* | 3.0%  |
| Step 4. Imputing utility values using multiple imputation             |       |      |        |       |
| T1 Utility value                                                      | 230   | 411  | 641    | 64.1% |
| T2 Utility value                                                      | 621   | 52   | 673    | 7.7%  |
| T3 Utility value                                                      | 674   | 112  | 786    | 14.2% |
| T4 Utility value                                                      | 656   | 121  | 777    | 15.6% |
| T5 Utility value                                                      | 695   | 95   | 790    | 12.0% |

\* Imputed dataset

## Costs

Missing resource items in completed iMCQ questionnaires were imputed using the mean value for each individual item. Multiple imputation was not deemed appropriate for resource use items due to volatility and unpredictability of resource use. If iMCQ questionnaires were missing in its entirety at a particular measurement, total costs were imputed using multiple imputation, using age at injury, health-related quality of life and costs at all available time points as independent variables. Before the multiple imputation procedure, costs were log-transformed to account for non-normality in the data. Table A2 shows the percentages of missing items of costs that were imputed in the imputation procedure.

*Table A2 Details imputation procedure healthcare costs*

| Imputed variable          | Missing items | Total | % missing |
|---------------------------|---------------|-------|-----------|
| T2 Total healthcare costs | 125           | 671   | 18.6%     |
| T3 Total healthcare costs | 218           | 793   | 27.5%     |
| T4 Total healthcare costs | 284           | 748   | 38.0%     |
| T5 Total healthcare costs | 318           | 750   | 42.4%     |

## References

1. White IR, Royston P, Wood AM (2011) Multiple imputation using chained equations: issues and guidance for practice. *Stat Med* 30:377-99
2. Little RJA (1988) Missing-data adjustments in large surveys. *J Bus Econ Stat* 6:287-96
